# Supplementary material for: Loss of symbiont infectivity following thermal stress can be a factor limiting recovery from bleaching in cnidarians
Source: PubMed Central journal article supplement (PMC7784860; doi:10.1038/s41396-020-00742-8), 2020-08-21
Supplement: 41396_2020_742_MOESM1_ESM.pdf [file 41396_2020_742_MOESM1_ESM.pdf]

**Loss of symbiont infectivity following thermal stress can be a factor limiting recovery from bleaching in cnidarians**

Mariko Kishimoto, Andrew H. Baird, Shinichiro Maruyama, Jun Minagawa, Shunichi Takahashi

**This PDF file includes:**

- Materials and Methods
- Supplementary Figures 1 to 4

## **Materials and Methods**

### ***Cultures and growth conditions***

Sea anemone *Exaiptasia pallida* (strain H2, commonly called Aiptasia) polyps were provided by Professor John Pringle (Stanford University). To eliminate symbionts, they were incubated at 34 °C in the dark for 1 month. The elimination of all symbionts was confirmed by the inability to detect any fluorescence from symbiotic algae under a fluorescence microscope (Leica M165FC) under 200 X magnification. The aposymbiotic Aiptasia polyps were cultured in filtered artificial seawater (REI-SEA marine 2; IWAKI) at 25 °C in darkness and fed freshly hatched *Artemia* nauplii once a week, until used in the experiments.

Symbiodiniaceae CCMP2459 (ITS2 type B2) was obtained from the National Center for Marine Algae and Microbiota (USA), and Symbiodiniaceae CS-164 (ITS2 type B1) from the Australian National Algae Culture Collection (AUS). To ensure that cultures were monoclonal, obtained cultures were subcultured from a single cell and their genotypes confirmed in a previous study [1]. Symbiont cells were grown in filtered (0.22 µm pore filter; Steritop-GP Filter Unit, Merck Millipore) artificial seawater (sea salt; Sigma-Aldrich) containing Daigo's IMK medium for marine microalgae (Wako). They were cultured in a growth cabinet MLR-350 (SANYO) at 25 °C under a cycle of 12 h of fluorescent light (100 µmol photons m<sup>-2</sup> s<sup>-1</sup>) and 12 h of darkness.

Aiptasia infected with symbionts were obtained by culturing aposymbiotic Aiptasia polyps with cultured symbiont cells (40,000 cells ml<sup>-1</sup>) in a 10 cm diameter dish with 50 ml of artificial seawater. Polyps were cultured at 25 °C under a cycle of 12 h of fluorescent light (100 µmol photons m<sup>-2</sup> s<sup>-1</sup>) and 12 h of darkness. Infection of symbiont cells into the host was confirmed by the change in coloration (white/brown). They were fed freshly hatched *Artemia* nauplii once a week, until used.

### ***Temperature shock treatment***

Cultured symbiotic algae were collected by centrifugation (1,500 g for 3 min) and seawater was replaced with new seawater (REI-SEA marine 2; IWAKI). Aposymbiotic Aiptasia polyps were

placed in 6-well plates with 5 ml of fresh seawater. For temperature treatments, symbiont cells and *Aiptasia* polyps were separately incubated at a growth temperature of 25 °C or an elevated temperature of 32 °C in the dark. To shock symbiont cells within *Aiptasia* polyps, symbiotic polyps were incubated at 25 °C or 32 °C in the dark for three days. Symbiont cells expelled from polyps were collected by centrifugation (1,500 g, 3 min) and re-suspended in fresh seawater for the use in experiments.

### ***Recovery of infectivity***

Following temperature shock treatments, Symbiodiniaceae cells were placed at 25 °C under a cycle of 12 h of fluorescent light (100  $\mu\text{mol photons m}^{-2} \text{s}^{-1}$ ) and 12 h of darkness in seawater (REI-SEA marine 2; IWAKI) for a maximum of 10 days. Then, cells were used for infection test.

### ***Quantification of infectivity***

An *Aiptasia* polyp was individually placed in a 6 well-plate with 5 ml of artificial seawater. Symbiont cells (approximately 9000 cells) were collected by centrifugation (1,500 g for 3 min) and mixed with fresh *Artemia* nauplii (3-5 individuals in 3  $\mu\text{l}$  seawater) for making a pellet. *Artemia* nauplii were used to accelerate the introduction of an algal pellet into the stomach cavity. The pellet was directly fed to *Aiptasia* using a glass Pasteur pipet. *Aiptasia* polyps were then incubated at 25 °C for 3 days under a cycle of 12 h of light (100  $\mu\text{mol photons m}^{-2} \text{s}^{-1}$ ) and 12 h of darkness for infection. Algal density (algal number per area) in *Aiptasia* was measured by counting algal cells in tentacles with a stereo fluorescence microscope (Leica M165FC or M205FA) after the incubation.

### ***Analysis of algal cell viability and density***

The viability of algal cells was measured by Evans blue staining following a previous study [2]. Evans blue stains cells with compromised membrane structures. We first examined with a light

microscope (Olympus CX43) that CS-164 cells are stained by Evans blue after the exposure to heat shock at 80 °C for 1 hour (Supplementary Fig. 3). Less chlorophyll fluorescence was observed using an inverted fluorescence microscope (Olympus IX71) with filters (WIG filter: Excitation 520~550nm band pass, Detection 580nm~) in Evans blue-stained cells, indicating that Evans blue staining is available for the detection of damaged CS-164 cells.

Symbiont cells (40,000 cell ml<sup>-1</sup>; 1 ml) were incubated at 25 °C or 32 °C in the dark for 3 days. Then, cells were used for the Evans blue staining [2]. Approximately, 50 cells were used for each test. Observations were taken under a light microscope (CX43 Olympus) and a fluorescence microscope (Olympus IX71).

For monitoring cell density, algal cells (40,000 cell ml<sup>-1</sup>; 10 ml) were incubated at 25 °C or 32 °C in the dark for 5 days. Algal cell density was measured by counting cells using a hemocytometer under a microscope.

### ***Statistics and reproducibility***

All statistical tests were performed using R 3.5.2 software. Statistical analysis between two samples was performed using Welch's *t*-test.  $P < 0.05$  was considered statistically significant.

### **Supplementary references**

1. Biquand E, Okubo N, Aihara Y, Rolland V, Hayward DC, Hatta M, et al. Acceptable symbiont cell size differs among cnidarian species and may limit symbiont diversity. *ISME J* 2017; **11**: 1702–1712.
2. Morera C, Villanueva MA. Heat treatment and viability assessment by Evans blue in cultured *Symbiodinium kawagutii* cells. *World J Microbiol Biotechnol* 2009; **25**: 1125–1128.

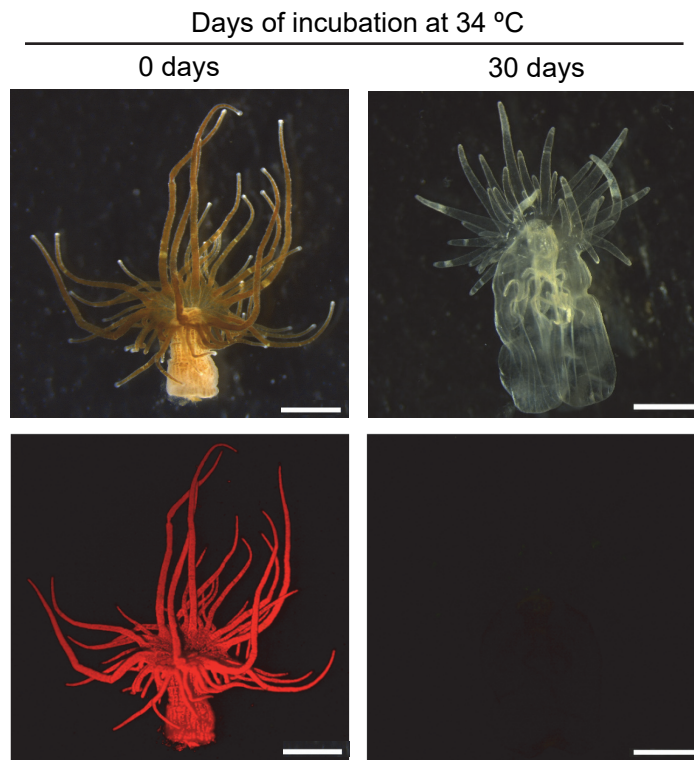

**Supplementary Fig. 1 Photographs of Aiptasia with and without algae of Symbiodiniaceae.** Aiptasia H2 polyps were incubated at 34 °C for 4 weeks to remove symbionts. Upper and lower photographs are light and fluorescence images, respectively. Red fluorescence represent chlorophyll fluorescence from algae. Scale is 1 mm.

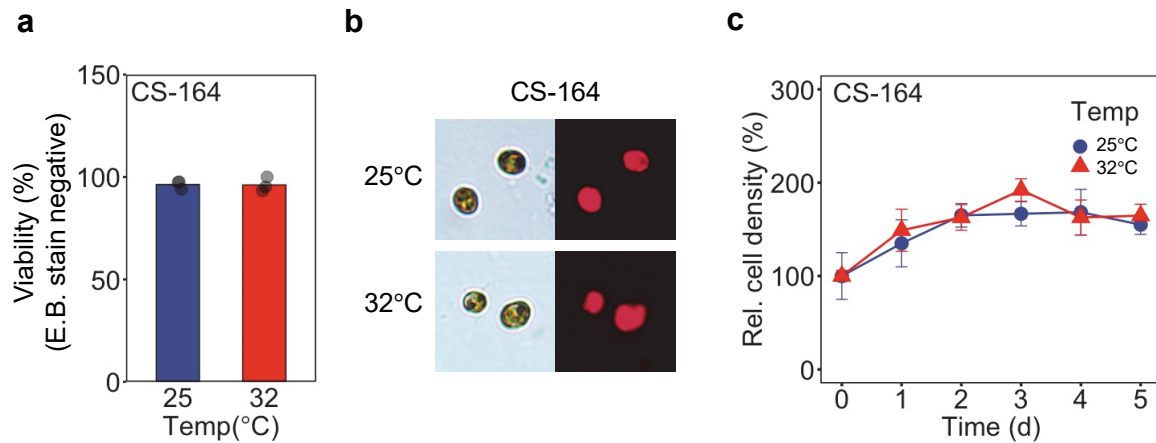

**Supplementary Figure 2: Effect of high temperature stress on algal viability and cell number.** Symbiodiniaceae CS-164 cells were incubated at 25 °C or 32 °C in dark. (a, b) Algal viability was examined by Evans blue staining after the incubation for 3 days. (b) Photographs of CS-164 cells were taken after Evans blue staining in bright field (left) and in fluorescence (right) with a microscope under 32 X magnification. (c) Cell density was monitored during the temperature treatment for 5 days by counting cell number using a hemocytometer. Values are percentages of the initial 40,000 cell ml<sup>-1</sup> (100%). Values are shown as mean ± SE from three independent experiments.

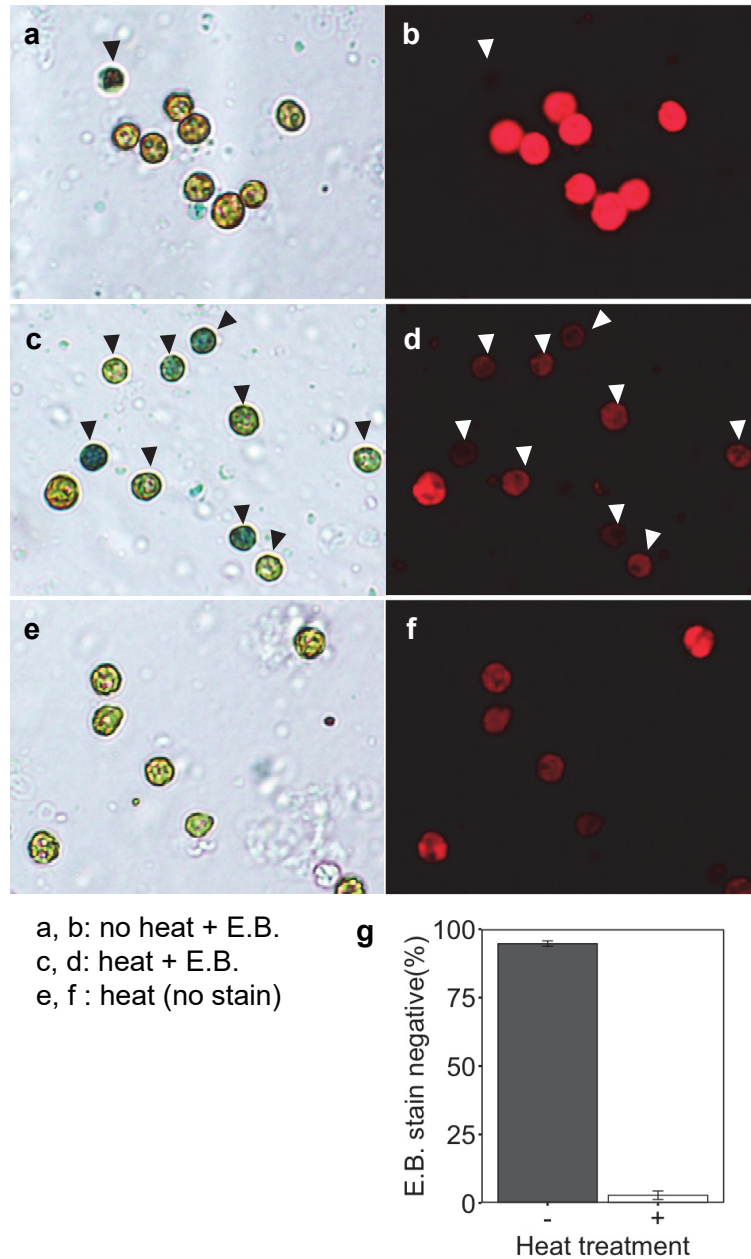

**Supplementary Figure 3: Positive and negative control of Evans blue staining.** Cultured algal cells of CS-164 were incubated at 80 °C in darkness for 1 h. Photographs of the cells were taken before (a, b) and after (c-f) the heat treatment, with (a-d) or without (e, f) Evans blue staining under 32 X magnification. Left side and right side are bright field images and fluorescence (WIG filter: Excitation 520~550nm band pass, Detection 580nm~) images, respectively. Evans blue stain-positive cells (dead cells) are indicated by black arrows in bright field images and white arrows in fluorescence images. (g) The ratios of stain-negative cells (living cells) were measured before and after the heat treatment.

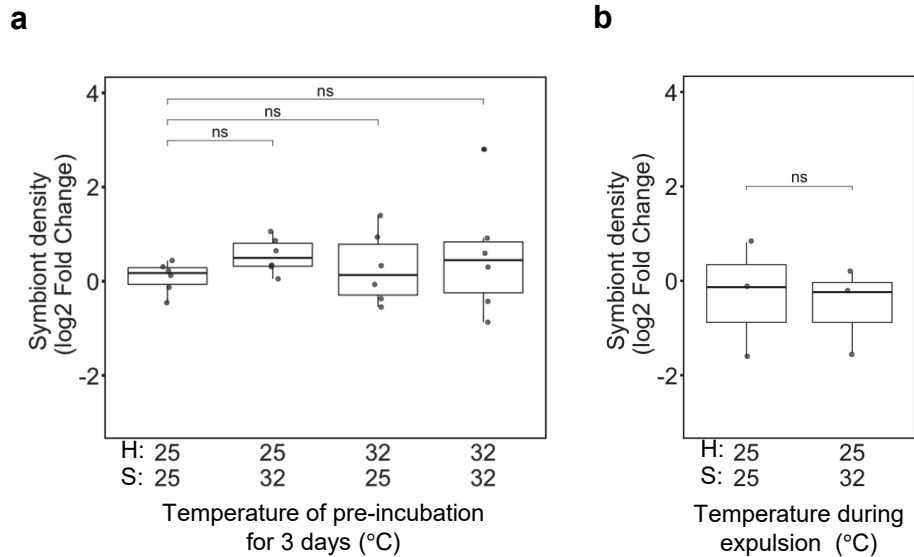

**Supplementary Figure 4: Infectivity of *B. psymphilum* CCMP2459 following exposure to elevated temperature.** (a) The density of symbionts in tentacles was measured 3 days after culturing *Aiptasia* polyps (H) with symbiont cells (S) in four different treatments, as indicated below the panel and outlined in the text. (b) The density of symbionts was measured 3 days after culturing *Aiptasia* polyps with symbiotic algae in different treatments. In this experiment, symbiotic algae that had been expelled from *Aiptasia* polyps cultured at 25 °C or 32 °C for 3 days were used to infect *Aiptasia*. (a, b) Values are log<sub>2</sub> fold changes with respect to the samples without any temperature treatment. Each point represents an independent experiment. ns, not significant (with  $p > 0.05$ ).
